# Supplementary material for: Coping with heat: behavioural and physiological responses of savanna elephants in their natural habitat
Source: PubMed Central journal article supplement (PMC5066386; doi:10.1093/conphys/cow044), 2016-10-15
Supplement: cow044_conphys-2016-013.pdf [file cow044_conphys-2016-013.pdf]

## **Supplementary Data S1-S4**

**S1:** Identity, sex, age, family group association and body measures of savanna elephants in the present study.

**S2:** Response and explanatory variables used in the analytical modelling.

**S3:** Summary of methods used to measure the parameters needed to record skin temperature on the elephants in the present study.

**S4:** Summaries of candidate generalised additive mixed models for all behavioural responses and responses of skin and core temperature to a number of explanatory variables (variables listed in S2).

S1. Identity, sex, age, family group association and body measures of savanna elephants in the present study.

| ID                           | Elephant name | Sex    | Age | Age class     | Mass (kg) | Shoulder height (m) | Family Group |
|------------------------------|---------------|--------|-----|---------------|-----------|---------------------|--------------|
| Adult female 1               | Cathy         | Female | 47  | Adult         | 3510      | 2.5                 | A            |
| Adult female 2*              | Shireni       | Female | 28  | Adult         | 2690      | 2.4                 | A            |
| Adult female 3 <sup>♦</sup>  | Kitty         | Female | 18  | Adult         | 2140      | 2.36                | B            |
| Weaned male 1*               | Abu           | Male   | 7   | Weaned calf   | 1740      | 2.18                | A            |
| Weaned female 1 <sup>♦</sup> | Lerato        | Female | 4   | Weaned calf   | 1100      | 1.86                | B            |
| Weaned female 2              | Paseka        | Female | 3   | Weaned calf   | 900       | 1.64                | A            |
| Suckling calf 1*             | Warona        | Female | 1   | Suckling calf | 320       | 1.34                | A            |

\*Weaned male 1 and suckling calf 1 are the offspring of adult female 2; <sup>♦</sup>Weaned female 1 is the offspring of adult female 3.

## S2. Response and explanatory variables used in the analytical modelling.

| Variables                     | Type         | Description                                                                                                                                          |
|-------------------------------|--------------|------------------------------------------------------------------------------------------------------------------------------------------------------|
| <b>Response variables</b>     |              |                                                                                                                                                      |
| Probability of walking        | Binary       | <b>1:</b> walking taking place<br><b>0:</b> no walking taking place                                                                                  |
| Probability of resting        | Binary       | <b>1:</b> resting taking place<br><b>0:</b> no resting taking place                                                                                  |
| Probability of foraging       | Binary       | <b>1:</b> foraging taking place<br><b>0:</b> no foraging taking place                                                                                |
| Probability of drinking       | Binary       | <b>1:</b> ingestion of water taking place<br><b>0:</b> no ingestion of water taking place                                                            |
| Probability of wetting        | Binary       | <b>1:</b> mud bathing/splashing/swimming taking place<br><b>0:</b> no wetting of any sort taking place                                               |
| Probability of shade use      | Binary       | <b>1:</b> >50% of the body exposed to shade<br><b>0:</b> >50% of the body exposed to direct sun                                                      |
| Duration of shade use         | Proportional | <b>0-100%:</b> percentage of time spent in the shade per hour                                                                                        |
| Skin temperature              | Continuous   | Surface temperature recordings at 10 minute intervals (°C)                                                                                           |
| Core temperature              | Continuous   | Intestinal body temperature recordings at 5 minute intervals (°C)                                                                                    |
| <b>Explanatory variables*</b> |              |                                                                                                                                                      |
| Black globe temperature       | continuous   | Black mini-globe temperature (°C), as an index of environmental temperature, measured at 5-minute intervals.                                         |
| Time of day ( <i>time</i> )   | continuous   | Each fifth minute interval (Binary behaviour models and core)<br>Hour of day (Duration of shade use models)                                          |
| Family group ( <i>group</i> ) | categorical  | <b>A:</b> 5 individuals; 2 adults, 2 weaned calves, 1 suckling calf<br><b>B:</b> 2 individuals; 1 adult and 1 weaned calf                            |
| Age class ( <i>class</i> )    | categorical  | <b>Adult:</b> Individuals over 11 years old<br><b>Weaned calf:</b> Individuals 3-7 years old<br><b>Suckling calf:</b> Individual 3 years and younger |
| Season                        | categorical  | <b>Hot-dry season:</b> Observations during September to November<br><b>Cool-flood season:</b> Observations during May to July                        |
| State                         | categorical  | <b>Dry:</b> elephant remained dry for entire hour of observation<br><b>Wet:</b> Wetting took place within the first 45min of the hour                |

*Notes:* \* names in italics are acronyms or abbreviations used throughout analysis

S3: Summary of methods used to measure the parameters needed to record skin temperature on the elephants in the present study.

We recorded skin temperature using an infrared thermal camera (FLIR T640, FLIR Systems Inc., Portland, Oregon, USA), which was mounted on a monopod. The camera had a 25° lens, with a 7.5–14 μm spectral range and was factory (FLIR Systems Inc., Portland, Oregon, USA) calibrated to record temperature with an accuracy of ± 1.0°C. The camera detects infrared radiation emitted from the surface of an object, which is converted into a temperature value. These values are depicted in the form of an infrared thermal image (thermograph). Each thermograph is 640 × 480 (307 200) pixels where each pixel represents a temperature value.

The radiation that is detected by the camera originates from three different sources; radiation from the target object, reflected radiation from the object's surroundings and radiation from the surrounding air. Therefore, the camera output can be described as follows:

$$W_{tot} = \varepsilon \cdot \tau \cdot W_{obj} + (1 - \varepsilon) \cdot \tau \cdot W_{amb} + (1 - \tau) \cdot W_{atm}$$

where  $\varepsilon$  is the emissivity of the target object,  $\tau$  is the transmittance of the atmosphere,  $W_{obj}$  is the amount of radiation emitted from the target object,  $W_{amb}$  is the amount of radiation emitted from the object's surroundings and  $W_{atm}$  is the amount of radiation present in the surrounding air. To ensure accurate skin temperature recordings we supplied the camera with the following parameters: emissivity=0.98, distance=10 m (unless specified otherwise), air temperature, relative humidity and reflected temperature.

*Emmissivity*

The amount of radiation emitted from an object comes from two major sources; radiation from the object itself (emissivity,  $\epsilon$ ) and radiation from the surrounding environment that is reflected off of the object (reflectivity,  $\rho$ ). This is described as follows:

$$\epsilon + \rho = 1$$

To calculate the emissivity of elephant skin, we placed an object of known emissivity (black scotch tape,  $\epsilon=0.95$ ) onto a piece of elephant skin. Both the skin and tape were cooled to the same temperature (5°C). The emissivity of the camera was adjusted to 0.95 and the surface temperature of the black tape was recorded. We then adjusted the emissivity of the camera until the temperature of the elephant skin was identical to the temperature of the tape. The emissivity at which the skin temperature and the tape temperature were identical represented the emissivity of elephant skin. This value was 0.98, which is similar to the emissivity of human skin. Therefore, 98% of the radiation emitted from elephant skin is radiation from the skin itself and 2% is from reflected radiation. An emissivity of 0.98 was used for elephant skin throughout the study.

#### *Distance*

The amount of radiation emitted from the air surrounding the target object is dependent on the volume of air between the object and the observer (Wolfe and Zissis 1989). Therefore, we supplied the camera with the distance between the camera and the focal elephant. We consistently maintained a distance of 10 m to avoid sampling error. Where it was not possible to maintain this distance, we visually estimated the distance and supplied this to the camera.

#### *Air temperature and relative humidity*

The amount of radiation emitted from the air surrounding the target object is also dependent on the temperature and water content of the air (Wolfe and Zissis 1989). Therefore, we

supplied the camera with ambient temperature and relative humidity that we recorded using a portable psychrometer (ExTech<sup>®</sup> HD500, Townsend West, Nashua, U.S.A).

### *Reflected temperature*

To account for reflected radiation from the environment, we calculated the reflected temperature by setting emissivity to 1.00 and distance to 0 m, before obtaining a thermal image of a diffuse reflector. The diffuse reflector comprised of a wrinkled sheet of aluminium foil placed over a spherical polystyrene ball (250 mm in diameter). Aluminium foil has an emissivity of 0.04. Therefore 99.6% of radiation from the surrounding environment is reflected from the aluminium foil. By setting  $\varepsilon$  to 1.00, we assumed that all radiation from the surrounding environment was represented by the average temperature of the diffuse reflector. We then substituted this average temperature into the camera parameters before obtaining a thermograph of the focal elephant. This ensured that skin temperature measurements excluded all reflected radiation from the surrounding environment.

### Reference:

Wolfe WL, Zissis GJ (1989) *The infrared handbook*. Department of the Navy, Washington, D.C.

S4 Table A. Summary of candidate generalised additive mixed models for the probability of wetting.

| no. | model <sub>i</sub>                  | K    | LogLik  | AIC <sub>i</sub> | $\Delta$ AIC <sub>i</sub> | w <sub>i</sub> | ROC   |
|-----|-------------------------------------|------|---------|------------------|---------------------------|----------------|-------|
| 1   | Tmg + time + season                 | 15.4 | -1066.0 | 2162.91          | 0                         | 0.26           | 0.757 |
| 2   | Tmg + time + group + season         | 15.6 | -1065.9 | 2162.98          | 0.07                      | 0.25           | 0.757 |
| 3   | Tmg + time + class + season         | 15.7 | -1065.9 | 2163.06          | 0.15                      | 0.24           | 0.757 |
| 4   | Tmg + time + group + class + season | 15.8 | -1065.8 | 2163.17          | 0.25                      | 0.23           | 0.757 |
| 5   | Tmg + time                          | 14.3 | -1071.0 | 2170.63          | 7.71                      | 0.01           | 0.751 |
| 6   | Tmg + time + group                  | 14.5 | -1070.9 | 2170.73          | 7.82                      | 0.01           | 0.751 |
| 7   | Tmg + time + class                  | 14.7 | -1070.7 | 2170.83          | 7.91                      | 0.00           | 0.752 |
| 8   | Tmg + time + group + class          | 14.8 | -1070.7 | 2170.96          | 8.05                      | 0.00           | 0.752 |
| 9   | Tmg + + season                      | 9.7  | -1085.6 | 2190.61          | 27.7                      | 0.00           | 0.730 |
| 10  | Tmg + group + season                | 9.8  | -1085.5 | 2190.69          | 27.78                     | 0.00           | 0.730 |
| 11  | Tmg + class + season                | 9.9  | -1085.5 | 2190.76          | 27.84                     | 0.00           | 0.730 |
| 12  | Tmg + group + class + season        | 10.1 | -1085.4 | 2190.87          | 27.96                     | 0.00           | 0.730 |
| 13  | Tmg                                 | 8.6  | -1092.6 | 2202.33          | 39.42                     | 0.00           | 0.720 |
| 14  | Tmg + group                         | 8.7  | -1092.5 | 2202.44          | 39.53                     | 0.00           | 0.720 |
| 15  | Tmg + class                         | 8.9  | -1092.4 | 2202.52          | 39.61                     | 0.00           | 0.720 |
| 16  | Tmg + group + class                 | 9.0  | -1092.3 | 2202.66          | 39.75                     | 0.00           | 0.720 |
| 17  | time + season                       | 12.2 | -1091.3 | 2207.06          | 44.15                     | 0.00           | 0.736 |
| 18  | time + group + season               | 12.4 | -1091.2 | 2207.13          | 44.22                     | 0.00           | 0.737 |
| 19  | time + class + season               | 12.4 | -1091.2 | 2207.17          | 44.26                     | 0.00           | 0.736 |
| 20  | time + group + class + season       | 12.5 | -1091.1 | 2207.27          | 44.36                     | 0.00           | 0.737 |
| 21  | season                              | 6.4  | -1117.7 | 2248.36          | 85.44                     | 0.00           | 0.699 |
| 22  | group + season                      | 6.6  | -1117.7 | 2248.43          | 85.52                     | 0.00           | 0.700 |
| 23  | class + season                      | 6.6  | -1117.6 | 2248.47          | 85.56                     | 0.00           | 0.700 |
| 24  | group + class + season              | 6.7  | -1117.6 | 2248.57          | 85.66                     | 0.00           | 0.700 |
| 25  | time                                | 11.2 | -1146.6 | 2315.48          | 152.56                    | 0.00           | 0.662 |
| 26  | time + group                        | 11.3 | -1146.5 | 2315.57          | 152.65                    | 0.00           | 0.663 |
| 27  | time + class                        | 11.4 | -1146.4 | 2315.64          | 152.73                    | 0.00           | 0.662 |
| 28  | time + group + class                | 11.6 | -1146.3 | 2315.76          | 152.84                    | 0.00           | 0.662 |
| 29  | group                               | 5.4  | -1172.4 | 2355.57          | 192.66                    | 0.00           | 0.600 |
| 30  | class                               | 5.5  | -1172.3 | 2355.65          | 192.74                    | 0.00           | 0.600 |
| 31  | group + class                       | 5.7  | -1172.2 | 2355.77          | 192.86                    | 0.00           | 0.600 |

Notes: For each model, the model number (no.), number of parameters (K), loglikelihood value (LogLik), Akaike information criteria (AIC<sub>i</sub>), difference in AIC between the best fit model and model<sub>i</sub> ( $\Delta$ AIC<sub>i</sub>), Akaike weight ( $w_i$ ), area under receivers operating characteristic curve (ROC) are shown. Parameters: Tmg = black mini-globe temperature; time = time of day; class= age class; group = family group.

S4 Table B. Summary of candidate generalised additive mixed models for the probability of shade use.

| no. | model <sub>i</sub>                  | K    | LogLik  | AIC <sub>i</sub> | ΔAIC <sub>i</sub> | w <sub>i</sub> | ROC   |
|-----|-------------------------------------|------|---------|------------------|-------------------|----------------|-------|
| 1   | Tmg + group                         | 9.5  | -3459.0 | 6936.85          | 0                 | 0.10           | 0.743 |
| 2   | Tmg + group + class                 | 9.7  | -3458.9 | 6937.06          | 0.22              | 0.09           | 0.743 |
| 3   | Tmg                                 | 9.9  | -3458.8 | 6937.26          | 0.41              | 0.08           | 0.743 |
| 4   | Tmg + class                         | 9.9  | -3458.7 | 6937.3           | 0.45              | 0.08           | 0.743 |
| 5   | Tmg + group + season                | 10.4 | -3458.3 | 6937.36          | 0.51              | 0.08           | 0.744 |
| 6   | Tmg + group + class + season        | 10.6 | -3458.2 | 6937.57          | 0.73              | 0.07           | 0.743 |
| 7   | Tmg + season                        | 10.8 | -3458.1 | 6937.76          | 0.91              | 0.07           | 0.743 |
| 8   | Tmg + class + season                | 10.9 | -3458.0 | 6937.8           | 0.95              | 0.06           | 0.743 |
| 9   | Tmg + time + group + season         | 11.4 | -3457.6 | 6938.12          | 1.27              | 0.05           | 0.744 |
| 10  | Tmg + time + group + class + season | 11.6 | -3457.5 | 6938.33          | 1.48              | 0.05           | 0.744 |
| 11  | Tmg + time + group                  | 10.5 | -3458.8 | 6938.48          | 1.63              | 0.05           | 0.743 |
| 12  | Tmg + time + + season               | 11.8 | -3457.4 | 6938.51          | 1.66              | 0.05           | 0.744 |
| 13  | Tmg + time + class + season         | 11.9 | -3457.4 | 6938.54          | 1.7               | 0.04           | 0.743 |
| 14  | Tmg + time + group + class          | 10.7 | -3458.7 | 6938.69          | 1.84              | 0.04           | 0.743 |
| 15  | Tmg + time                          | 10.9 | -3458.6 | 6938.88          | 2.03              | 0.04           | 0.743 |
| 16  | Tmg + time + class                  | 10.9 | -3458.5 | 6938.92          | 2.08              | 0.04           | 0.743 |
| 17  | time + group + season               | 10.7 | -3591.2 | 7203.78          | 266.93            | 0.00           | 0.710 |
| 18  | time + group + class + season       | 10.8 | -3591.1 | 7203.88          | 267.03            | 0.00           | 0.710 |
| 19  | time + season                       | 10.8 | -3591.1 | 7203.93          | 267.08            | 0.00           | 0.710 |
| 20  | time + class + season               | 10.9 | -3591.1 | 7203.95          | 267.11            | 0.00           | 0.710 |
| 21  | group + season                      | 6.8  | -3686.4 | 7386.4           | 449.56            | 0.00           | 0.687 |
| 22  | group + class + season              | 6.9  | -3686.4 | 7386.51          | 449.66            | 0.00           | 0.687 |
| 23  | season                              | 6.9  | -3686.4 | 7386.55          | 449.7             | 0.00           | 0.687 |
| 24  | class + season                      | 6.9  | -3686.4 | 7386.58          | 449.73            | 0.00           | 0.687 |
| 25  | time + group                        | 9.3  | -3770.3 | 7559.23          | 622.39            | 0.00           | 0.653 |
| 26  | time + group + class                | 9.4  | -3770.3 | 7559.35          | 622.51            | 0.00           | 0.654 |
| 27  | time                                | 9.5  | -3770.2 | 7559.42          | 622.57            | 0.00           | 0.653 |
| 28  | time + class                        | 9.5  | -3770.2 | 7559.45          | 622.61            | 0.00           | 0.653 |
| 29  | group                               | 5.7  | -3858.2 | 7727.77          | 790.92            | 0.00           | 0.618 |
| 30  | group + class                       | 5.8  | -3858.1 | 7727.89          | 791.04            | 0.00           | 0.618 |
| 31  | class                               | 5.9  | -3858.1 | 7727.99          | 791.14            | 0.00           | 0.618 |

*Notes:* For each model, the model number (no.), number of parameters (K), loglikelihood value (LogLik), Akaike information criteria (AIC<sub>i</sub>), difference in AIC between the best fit model and model<sub>i</sub> (ΔAIC<sub>i</sub>), Akaike weight (w<sub>i</sub>), area under receivers operating characteristic curve (ROC) are shown. Parameters: Tmg = black mini-globe temperature; time = time of day; class= age class; group = family group.



S4 Table C. Summary of candidate generalised additive mixed models for the duration of shade use.

| no. | model <sub>i</sub>                          | K  | LogLik | AIC <sub>i</sub> | $\Delta$ AIC <sub>i</sub> | w <sub>i</sub> | R <sup>2</sup> |
|-----|---------------------------------------------|----|--------|------------------|---------------------------|----------------|----------------|
| 1   | Tmg + state + group                         | 7  | -879.7 | 1773.34          | 0.00                      | 0.37           | 0.54           |
| 2   | Tmg + state + group + class                 | 8  | -879.4 | 1774.73          | 1.39                      | 0.18           | 0.53           |
| 3   | Tmg + state + group + season                | 8  | -879.5 | 1774.94          | 1.60                      | 0.17           | 0.54           |
| 4   | Tmg + state + group + season + class        | 9  | -879.2 | 1776.48          | 3.14                      | 0.08           | 0.53           |
| 5   | Tmg + time + state + group                  | 9  | -879.3 | 1776.62          | 3.27                      | 0.07           | 0.54           |
| 6   | Tmg + time + state + group + class          | 10 | -879.0 | 1777.99          | 4.65                      | 0.04           | 0.54           |
| 7   | Tmg + state                                 | 6  | -883.4 | 1778.74          | 5.40                      | 0.02           | 0.48           |
| 8   | Tmg + time + state + group + season         | 10 | -879.4 | 1778.85          | 5.51                      | 0.02           | 0.54           |
| 9   | Tmg + state + season                        | 7  | -883.1 | 1780.25          | 6.91                      | 0.01           | 0.47           |
| 10  | Tmg + time + state + group + season + class | 11 | -879.2 | 1780.34          | 7.00                      | 0.01           | 0.54           |
| 11  | Tmg + state + class                         | 7  | -883.3 | 1780.58          | 7.23                      | 0.01           | 0.48           |
| 12  | Tmg + time + state                          | 8  | -883.0 | 1782.07          | 8.73                      | 0.00           | 0.48           |
| 13  | Tmg + state + season + class                | 8  | -883.1 | 1782.13          | 8.79                      | 0.00           | 0.47           |
| 14  | Tmg + time + state + class                  | 9  | -883.0 | 1783.91          | 10.57                     | 0.00           | 0.48           |
| 15  | Tmg + time + state + season                 | 9  | -883.2 | 1784.31          | 10.97                     | 0.00           | 0.47           |
| 16  | Tmg + time + state + season + class         | 10 | -883.1 | 1786.17          | 12.83                     | 0.00           | 0.47           |
| 17  | Tmg + group                                 | 6  | -911.5 | 1834.99          | 61.65                     | 0.00           | 0.37           |
| 18  | state + time + group + season               | 8  | -909.7 | 1835.33          | 61.99                     | 0.00           | 0.36           |
| 19  | Tmg + group + class                         | 7  | -910.7 | 1835.48          | 62.14                     | 0.00           | 0.37           |
| 20  | Tmg + group + season                        | 7  | -911.6 | 1837.28          | 63.94                     | 0.00           | 0.37           |
| 21  | time + state + group + season + class       | 9  | -909.7 | 1837.48          | 64.14                     | 0.00           | 0.36           |
| 22  | Tmg + group + season + class                | 8  | -910.9 | 1837.74          | 64.40                     | 0.00           | 0.37           |
| 23  | Tmg + time + group                          | 8  | -911.5 | 1839.02          | 65.68                     | 0.00           | 0.37           |
| 24  | state + time + season                       | 7  | -912.6 | 1839.28          | 65.94                     | 0.00           | 0.29           |
| 25  | Tmg + time + group + class                  | 9  | -910.7 | 1839.48          | 66.14                     | 0.00           | 0.37           |
| 26  | Tmg                                         | 5  | -915.1 | 1840.25          | 66.91                     | 0.00           | 0.30           |
| 27  | Tmg + time + group + season                 | 9  | -911.6 | 1841.25          | 67.91                     | 0.00           | 0.37           |
| 28  | time + state + season + class               | 8  | -912.7 | 1841.34          | 68.00                     | 0.00           | 0.29           |
| 29  | Tmg + time + group + season + class         | 10 | -910.8 | 1841.67          | 68.33                     | 0.00           | 0.37           |
| 30  | Tmg + class                                 | 6  | -915.0 | 1841.92          | 68.58                     | 0.00           | 0.30           |
| 31  | Tmg + season                                | 6  | -915.3 | 1842.55          | 69.21                     | 0.00           | 0.30           |
| 32  | Tmg + season + class                        | 7  | -915.1 | 1844.23          | 70.89                     | 0.00           | 0.30           |
| 33  | Tmg + time                                  | 7  | -915.1 | 1844.28          | 70.94                     | 0.00           | 0.30           |
| 34  | Tmg + time + class                          | 8  | -915.0 | 1845.95          | 72.61                     | 0.00           | 0.30           |
| 35  | Tmg + time + season                         | 8  | -915.3 | 1846.55          | 73.21                     | 0.00           | 0.30           |
| 36  | Tmg + time + season + class                 | 9  | -915.1 | 1848.23          | 74.89                     | 0.00           | 0.30           |
| 37  | state + group + season                      | 6  | -924.8 | 1861.59          | 88.25                     | 0.00           | 0.27           |
| 38  | state + group + season + class              | 7  | -924.8 | 1863.67          | 90.33                     | 0.00           | 0.27           |
| 39  | group + time + season                       | 7  | -925.0 | 1863.98          | 90.64                     | 0.00           | 0.26           |
| 40  | state + season                              | 5  | -927.4 | 1864.86          | 91.52                     | 0.00           | 0.19           |
| 41  | time + group + season + class               | 8  | -924.9 | 1865.83          | 92.48                     | 0.00           | 0.26           |
| 42  | state + season + class                      | 6  | -927.4 | 1866.89          | 93.55                     | 0.00           | 0.19           |

Summary of candidate models for the duration of shade use continued...

| no. | model <sub>i</sub>           | K | LogLik | AIC <sub>i</sub> | $\Delta$ AIC <sub>i</sub> | w <sub>i</sub> | R <sup>2</sup> |
|-----|------------------------------|---|--------|------------------|---------------------------|----------------|----------------|
| 43  | time + season                | 6 | -928.1 | 1868.10          | 94.76                     | 0.00           | 0.18           |
| 44  | time + season + class        | 7 | -928.0 | 1870.05          | 96.71                     | 0.00           | 0.18           |
| 45  | state + time + group         | 7 | -929.6 | 1873.19          | 99.85                     | 0.00           | 0.19           |
| 46  | time + state + group + class | 8 | -929.5 | 1875.02          | 101.68                    | 0.00           | 0.19           |
| 47  | time + state                 | 6 | -932.2 | 1876.39          | 103.05                    | 0.00           | 0.12           |
| 48  | time + state + class         | 7 | -932.2 | 1878.30          | 104.96                    | 0.00           | 0.12           |
| 49  | state + group                | 5 | -934.5 | 1878.98          | 105.64                    | 0.00           | 0.10           |
| 50  | state + group + class        | 6 | -934.4 | 1880.89          | 107.55                    | 0.00           | 0.10           |
| 51  | state                        | 4 | -936.8 | 1881.51          | 108.17                    | 0.00           | 0.03           |
| 52  | time + group                 | 6 | -935.4 | 1882.85          | 109.51                    | 0.00           | 0.13           |
| 53  | group + season               | 5 | -936.7 | 1883.41          | 110.07                    | 0.00           | 0.20           |
| 54  | state + class                | 5 | -936.8 | 1883.69          | 110.35                    | 0.00           | 0.03           |
| 55  | time + group + class         | 7 | -935.4 | 1884.81          | 111.46                    | 0.00           | 0.13           |
| 56  | group + season + class       | 6 | -936.6 | 1885.24          | 111.90                    | 0.00           | 0.20           |
| 57  | time                         | 5 | -938.1 | 1886.15          | 112.81                    | 0.00           | 0.06           |
| 58  | season                       | 5 | -939.4 | 1886.77          | 113.42                    | 0.00           | 0.12           |
| 59  | time + class                 | 6 | -938.2 | 1888.41          | 115.07                    | 0.00           | 0.07           |
| 60  | season + class               | 5 | -939.6 | 1889.13          | 115.79                    | 0.00           | 0.11           |
| 61  | group                        | 4 | -942.2 | 1892.43          | 119.09                    | 0.00           | 0.07           |
| 62  | group + class                | 5 | -942.2 | 1894.32          | 120.98                    | 0.00           | 0.07           |
| 63  | class                        | 4 | -944.7 | 1897.41          | 124.07                    | 0.00           | 0.00           |

Notes: For each model the number of parameters (K), loglikelihood value (LogLik), difference in AIC between the best fit model and model<sub>i</sub> ( $\Delta$ AIC<sub>i</sub>), Akaike weight (w<sub>i</sub>), adjusted coefficient of determination (R<sup>2</sup>) are shown. Parameters: Tmg = black mini-globe temperature; time = time of day; class= age class; group = family group; state = whether elephant was wet or dry.

S4 Table D. Summary of candidate generalised additive mixed models for the probability of drinking.

| no. | model <sub>i</sub>          | K   | LogLik | AIC <sub>i</sub> | $\Delta$ AIC <sub>i</sub> | w <sub>i</sub> | ROC   |
|-----|-----------------------------|-----|--------|------------------|---------------------------|----------------|-------|
| 1   | Tmg + time                  | 4.3 | -492.3 | 993.23           | 0                         | 0.21           | 0.644 |
| 2   | Tmg + time + class          | 5.3 | -491.4 | 993.54           | 0.31                      | 0.18           | 0.650 |
| 3   | Tmg + time + season         | 5.3 | -491.8 | 994.16           | 0.93                      | 0.13           | 0.645 |
| 4   | Tmg + time + class + season | 6.3 | -490.8 | 994.18           | 0.95                      | 0.13           | 0.650 |
| 5   | time                        | 2.0 | -495.2 | 994.46           | 1.23                      | 0.12           | 0.629 |
| 6   | time + class                | 3.0 | -494.4 | 994.75           | 1.51                      | 0.10           | 0.634 |
| 7   | time + season               | 3.0 | -494.9 | 995.81           | 2.58                      | 0.06           | 0.631 |
| 8   | time + class + season       | 4.0 | -493.9 | 995.89           | 2.65                      | 0.06           | 0.637 |
| 9   | Tmg                         | 3.1 | -500.8 | 1007.79          | 14.56                     | 0.00           | 0.570 |
| 10  | Tmg + class                 | 4.1 | -500.0 | 1008.17          | 14.94                     | 0.00           | 0.585 |
| 11  | Tmg + season                | 4.3 | -500.4 | 1009.22          | 15.99                     | 0.00           | 0.580 |
| 12  | Tmg + class + season        | 5.2 | -499.7 | 1009.78          | 16.55                     | 0.00           | 0.591 |
| 13  | class                       | 2.0 | -503.9 | 1011.88          | 18.65                     | 0.00           | 0.554 |
| 14  | season                      | 2.0 | -504.4 | 1012.88          | 19.65                     | 0.00           | 0.551 |
| 15  | class + season              | 3.0 | -503.5 | 1013.07          | 19.84                     | 0.00           | 0.556 |

*Notes:* For each model, the model number (no.), number of parameters (K), loglikelihood value (LogLik), Akaike information criteria (AIC<sub>i</sub>), difference in AIC between the best fit model and model<sub>i</sub> ( $\Delta$ AIC<sub>i</sub>), Akaike weight (w<sub>i</sub>), area under receivers operating characteristic curve (ROC) are shown. Parameters: Tmg = black mini-globe temperature; time = time of day; class= age class; group = family group.

S4 Table E. Summary of candidate generalised additive mixed models for the probability of walking.

| no. | model <sub>i</sub>          | K    | LogLik   | AIC <sub>i</sub> | $\Delta$ AIC <sub>i</sub> | w <sub>i</sub> | ROC   |
|-----|-----------------------------|------|----------|------------------|---------------------------|----------------|-------|
| 1   | Tmg + time + group          | 9.5  | -1528.09 | 3075.26          | 0.00                      | 0.52           | 0.622 |
| 2   | Tmg + time + group + season | 10.4 | -1527.98 | 3076.78          | 1.52                      | 0.24           | 0.624 |
| 3   | Tmg + time                  | 12.0 | -1526.86 | 3077.66          | 2.40                      | 0.16           | 0.626 |
| 4   | Tmg + time + season         | 13.0 | -1526.68 | 3079.35          | 4.09                      | 0.07           | 0.627 |
| 5   | Tmg + group                 | 4.9  | -1536.98 | 3083.78          | 8.52                      | 0.01           | 0.599 |
| 6   | Tmg + group + season        | 5.8  | -1537.01 | 3085.69          | 10.43                     | 0.00           | 0.599 |
| 7   | Tmg                         | 7.3  | -1535.73 | 3086.07          | 10.81                     | 0.00           | 0.605 |
| 8   | Tmg + season                | 8.3  | -1535.72 | 3088.02          | 12.76                     | 0.00           | 0.605 |
| 9   | time + group + season       | 8.6  | -1537.09 | 3091.34          | 16.08                     | 0.00           | 0.600 |
| 10  | time + + season             | 10.4 | -1536.24 | 3093.33          | 18.07                     | 0.00           | 0.606 |
| 11  | time + group                | 6.8  | -1541.69 | 3096.99          | 21.73                     | 0.00           | 0.587 |
| 12  | time                        | 9.4  | -1540.5  | 3099.87          | 24.61                     | 0.00           | 0.595 |
| 13  | group + season              | 4.0  | -1548.12 | 3104.24          | 28.98                     | 0.00           | 0.574 |
| 14  | season                      | 5.8  | -1547.26 | 3106.17          | 30.91                     | 0.00           | 0.577 |
| 15  | group                       | 2.2  | -1552.97 | 3110.26          | 35.00                     | 0.00           | 0.564 |

Notes: For each model, the model number (no.), number of parameters (K), loglikelihood value (LogLik), Akaike information criteria (AIC<sub>i</sub>), difference in AIC between the best fit model and model<sub>i</sub> ( $\Delta$ AIC<sub>i</sub>), Akaike weight (w<sub>i</sub>), area under receivers operating characteristic curve (ROC) are shown. Parameters: Tmg = black mini-globe temperature; time = time of day; class= age class; group = family group.

S4 Table F. Summary of candidate generalised additive mixed models for the probability of resting.

| no. | model <sub>i</sub>                  | K    | LogLik  | AIC <sub>i</sub> | $\Delta$ AIC <sub>i</sub> | w <sub>i</sub> | ROC   |
|-----|-------------------------------------|------|---------|------------------|---------------------------|----------------|-------|
| 1   | Tmg                                 | 7.5  | -557.83 | 1130.65          | 0                         | 0.10           | 0.788 |
| 2   | Tmg + class                         | 7.6  | -557.85 | 1130.86          | 0.21                      | 0.09           | 0.789 |
| 3   | Tmg + group                         | 7.6  | -557.81 | 1130.89          | 0.24                      | 0.09           | 0.788 |
| 4   | Tmg + time                          | 9.8  | -555.69 | 1130.98          | 0.33                      | 0.09           | 0.793 |
| 5   | Tmg + group + class                 | 7.7  | -557.81 | 1131.08          | 0.43                      | 0.08           | 0.789 |
| 6   | Tmg + time + class                  | 9.9  | -555.71 | 1131.18          | 0.53                      | 0.08           | 0.793 |
| 7   | Tmg + time + group                  | 9.9  | -555.67 | 1131.21          | 0.56                      | 0.08           | 0.793 |
| 8   | Tmg + time + group + class          | 10.  | -555.66 | 1131.40          | 0.75                      | 0.07           | 0.794 |
| 9   | Tmg + season                        | 8.6  | -557.33 | 1131.85          | 1.2                       | 0.06           | 0.789 |
| 10  | Tmg + class + season                | 8.7  | -557.34 | 1132.05          | 1.4                       | 0.05           | 0.790 |
| 11  | Tmg + group + season                | 8.7  | -557.32 | 1132.10          | 1.45                      | 0.05           | 0.789 |
| 12  | Tmg + group + class + season        | 8.8  | -557.31 | 1132.28          | 1.63                      | 0.04           | 0.789 |
| 13  | Tmg + time + season                 | 10.8 | -555.56 | 1132.63          | 1.98                      | 0.04           | 0.793 |
| 14  | Tmg + time + class + season         | 10.8 | -555.59 | 1132.84          | 2.19                      | 0.03           | 0.792 |
| 15  | Tmg + time + group + season         | 10.9 | -555.54 | 1132.87          | 2.21                      | 0.03           | 0.793 |
| 16  | Tmg + time + group + class + season | 11   | -555.54 | 1133.05          | 2.4                       | 0.03           | 0.793 |
| 17  | time + season                       | 9.5  | -566.68 | 1152.31          | 21.66                     | 0.00           | 0.781 |
| 18  | time + group + season               | 9.6  | -566.67 | 1152.51          | 21.86                     | 0.00           | 0.781 |
| 19  | time + class + season               | 9.6  | -566.68 | 1152.53          | 21.88                     | 0.00           | 0.781 |
| 20  | time + group + class + season       | 9.7  | -566.64 | 1152.71          | 22.06                     | 0.00           | 0.781 |
| 21  | season                              | 6.5  | -576.43 | 1165.81          | 35.16                     | 0.00           | 0.752 |
| 22  | group + season                      | 6.6  | -576.42 | 1166.01          | 35.36                     | 0.00           | 0.752 |
| 23  | class + season                      | 6.6  | -576.43 | 1166.03          | 35.38                     | 0.00           | 0.752 |
| 24  | group + class + season              | 6.7  | -576.4  | 1166.21          | 35.56                     | 0.00           | 0.752 |
| 25  | time                                | 8.4  | -577.86 | 1172.58          | 41.93                     | 0.00           | 0.757 |
| 26  | time + class                        | 8.5  | -577.86 | 1172.78          | 42.13                     | 0.00           | 0.757 |
| 27  | time + group                        | 8.6  | -577.84 | 1172.79          | 42.14                     | 0.00           | 0.757 |
| 28  | time + group + class                | 8.7  | -577.83 | 1172.96          | 42.31                     | 0.00           | 0.755 |
| 29  | class                               | 5.6  | -587.46 | 1186.03          | 55.38                     | 0.00           | 0.716 |
| 30  | group                               | 5.6  | -587.45 | 1186.05          | 55.4                      | 0.00           | 0.716 |
| 31  | group + class                       | 5.7  | -587.43 | 1186.23          | 55.57                     | 0.00           | 0.716 |

Notes: For each model, the model number (no.), number of parameters (K), loglikelihood value (LogLik), Akaike information criteria (AIC<sub>i</sub>), difference in AIC between the best fit model and model<sub>i</sub> ( $\Delta$ AIC<sub>i</sub>), Akaike weight (w<sub>i</sub>), area under receivers operating characteristic curve (ROC) are shown. Parameters: Tmg = black mini-globe temperature; time = time of day; class= age class; group = family group.

S4 Table G. Summary of candidate generalised additive mixed models for the probability of feeding.

| no. | model <sub>i</sub>          | K    | LogLik  | AIC <sub>i</sub> | $\Delta$ AIC <sub>i</sub> | w <sub>i</sub> | ROC   |
|-----|-----------------------------|------|---------|------------------|---------------------------|----------------|-------|
| 1   | Tmg + time + season         | 12.2 | -2794.1 | 5612.69          | 0                         | 0.47           | 0.636 |
| 2   | Tmg + time + class + season | 12.4 | -2794.0 | 5612.91          | 0.22                      | 0.42           | 0.636 |
| 3   | Tmg + season                | 9.7  | -2799.0 | 5617.43          | 4.74                      | 0.04           | 0.634 |
| 4   | Tmg + class + season        | 9.9  | -2798.9 | 5617.66          | 4.97                      | 0.04           | 0.634 |
| 5   | Tmg + time                  | 10.9 | -2799.0 | 5619.79          | 7.1                       | 0.01           | 0.634 |
| 6   | Tmg + time + class          | 11.2 | -2798.8 | 5620.01          | 7.31                      | 0.01           | 0.634 |
| 7   | Tmg                         | 8.9  | -2804.5 | 5626.93          | 14.24                     | 0.00           | 0.629 |
| 8   | Tmg + class                 | 9.2  | -2804.4 | 5627.16          | 14.47                     | 0.00           | 0.629 |
| 9   | time + season               | 9.9  | -2814.3 | 5648.29          | 35.6                      | 0.00           | 0.620 |
| 10  | time + class + season       | 10.1 | -2814.2 | 5648.51          | 35.81                     | 0.00           | 0.620 |
| 11  | season                      | 6.5  | -2829.8 | 5672.45          | 59.76                     | 0.00           | 0.610 |
| 12  | class + season              | 6.7  | -2829.7 | 5672.67          | 59.98                     | 0.00           | 0.610 |
| 13  | time                        | 8.8  | -2862.0 | 5741.70          | 129.01                    | 0.00           | 0.581 |
| 14  | time + class                | 9.0  | -2861.9 | 5741.93          | 129.24                    | 0.00           | 0.581 |
| 15  | class                       | 5.6  | -2876.7 | 5764.46          | 151.76                    | 0.00           | 0.559 |

*Notes:* For each model, the model number (no.), number of parameters (K), loglikelihood value (LogLik), Akaike information criteria (AIC<sub>i</sub>), difference in AIC between the best fit model and model<sub>i</sub> ( $\Delta$ AIC<sub>i</sub>), Akaike weight (w<sub>i</sub>), area under receivers operating characteristic curve (ROC) are shown. Parameters: Tmg = black mini-globe temperature; time = time of day; class= age class; group = family group.

S4 Table H. Summary of candidate generalised additive mixed models for variation in skin temperature for seven elephants.

|   | Candidate model                | K  | LogLik | AIC   | $\Delta AIC_i$ | $w_i$ | $R^2$ |
|---|--------------------------------|----|--------|-------|----------------|-------|-------|
| 1 | mini-globe + state + age class | 10 | -18526 | 37072 | 0              | 0.86  | 0.36  |
| 2 | mini-globe + state             | 8  | -18529 | 37075 | 3.59           | 0.14  | 0.32  |
| 3 | mini-globe + age class         | 8  | -19019 | 38053 | 981.91         | 0     | 0.26  |
| 4 | mini-globe                     | 6  | -19022 | 38057 | 984.97         | 0     | 0.21  |
| 5 | age class + state              | 8  | -20139 | 40293 | 3221.88        | 0     | 0.07  |
| 6 | State                          | 6  | -20142 | 40297 | 3224.97        | 0     | 0.03  |
| 7 | age class                      | 6  | -20263 | 40539 | 3467.41        | 0     | 0.04  |

Note: K=number of parameters in model; LogLik= log likelihood; AIC= Akaike's information criterion;  $\Delta AIC_i$ = Difference in AIC between the model and best fitting model;  $w_i$ =Akaike weight;  $R^2$ =adjusted coefficient of determination. Parameters: mini-globe = black mini-globe temperature; state = whether elephant is wet or dry.

S4 Table I. Summary of candidate generalised additive mixed models for variation in core temperature for five elephants.

|    | Candidate model                       | K  | LogLik  | AIC    | $\Delta AIC_i$ | $w_i$ | $R^2$ |
|----|---------------------------------------|----|---------|--------|----------------|-------|-------|
| 1  | mini-globe + time + age class         | 8  | -60.98  | 137.97 | 0.00           | 0.49  | 0.31  |
| 2  | mini-globe + time                     | 7  | -62.25  | 138.49 | 0.52           | 0.38  | 0.18  |
| 3  | time + age class                      | 6  | -64.89  | 141.77 | 3.80           | 0.07  | 0.30  |
| 4  | time                                  | 5  | -66.23  | 142.46 | 4.49           | 0.05  | 0.17  |
| 5  | mini-globe + time + age class + state | 10 | -65.21  | 150.42 | 12.46          | 0.00  | 0.31  |
| 6  | mini-globe + time + state             | 9  | -66.49  | 150.98 | 13.01          | 0.00  | 0.18  |
| 7  | time + age class + state              | 8  | -69.72  | 155.45 | 17.48          | 0.00  | 0.30  |
| 8  | time + state                          | 7  | -71.08  | 156.17 | 18.20          | 0.00  | 0.17  |
| 9  | mini-globe + age class                | 6  | -112.54 | 237.08 | 99.11          | 0.00  | 0.19  |
| 10 | mini-globe + age class + state        | 6  | -112.54 | 237.08 | 99.11          | 0.00  | 0.19  |
| 11 | mini-globe                            | 5  | -113.77 | 237.55 | 99.58          | 0.00  | 0.07  |
| 12 | mini-globe + state                    | 7  | -117.47 | 248.93 | 110.97         | 0.00  | 0.08  |
| 13 | age class                             | 4  | -133.24 | 274.47 | 136.51         | 0.00  | 0.13  |
| 14 | age class + state                     | 6  | -136.98 | 285.97 | 148.00         | 0.00  | 0.12  |
| 15 | state                                 | 5  | -138.28 | 286.56 | 148.59         | 0.00  | -0.01 |

Note: K=number of parameters in model; LogLik= log likelihood; AIC= Akaike's information criterion;  $\Delta AIC_i$ = Difference in AIC between the model and best fitting model;  $w_i$ =Akaike weight;  $R^2$ =adjusted coefficient of determination. Parameters: mini-globe = black mini-globe temperature; time = time of day; state = whether elephant is wet or dry.
